# Supplementary material for: Calcium-Bound S100P Protein Is a Promiscuous Binding Partner of the Four-Helical Cytokines
Source: MDPI journal article supplement (doi:10.3390/ijms231912000), 2022-10-09
Supplement: s1 [file s1]

## Supplementary Materials

### Calcium-Bound S100P Protein Is a Promiscuous Binding Partner of the Four-Helical Cytokines

Alexey S. Kazakov <sup>1</sup>, Evgenia I. Deryusheva <sup>1</sup>, Maria E. Permyakova <sup>1</sup>, Andrey S. Sokolov <sup>1</sup>, Victoria A. Rastrygina <sup>1</sup>, Vladimir N. Uversky <sup>1,2,\*</sup>, Eugene A. Permyakov <sup>1</sup> and Sergei E. Permyakov <sup>1,\*</sup>

<sup>1</sup> Institute for Biological Instrumentation, Pushchino Scientific Center for Biological Research of the Russian Academy of Sciences, Institutskaya str., 7, Pushchino, Moscow Region 142290, Russia

<sup>2</sup> Department of Molecular Medicine and USF Health Byrd Alzheimer's Research Institute, Morsani College of Medicine, University of South Florida, Tampa, FL 33612, USA

\* Correspondence: [vuversky@usf.edu](mailto:vuversky@usf.edu) (V.N.U.); [permyakov.s@gmail.com](mailto:permyakov.s@gmail.com) (S.E.P.); Tel.: +7-(495)-143-7740 (S.E.P.); Fax: +7-(4967)-33-05-22 (S.E.P.)

**Table S1.** The four-helical cytokine samples that did not reveal specificity to S100P, according to SPR spectroscopy (cytokine immobilization on the sensor chip surface by amine coupling).

| <i>Full name</i>                        | <i>Abbreviation</i> | <i>UniProt ID</i> | <i>Manufacturer</i>    | <i>Cat. number</i> | <i>Source</i> |
|-----------------------------------------|---------------------|-------------------|------------------------|--------------------|---------------|
| <i>Short-chain cytokines</i>            |                     |                   |                        |                    |               |
| Macrophage colony-stimulating factor 1  | M-CSF               | P09603            | PeptoTech              | 300-25             | <i>E.coli</i> |
| Interleukin-2                           | IL-2                | P60568            | PeptoTech              | AF-200-02          | <i>E.coli</i> |
| Interleukin-4                           | IL-4                | P05112            | PeptoTech              | AF-200-04          | <i>E.coli</i> |
| <i>Long-chain cytokines</i>             |                     |                   |                        |                    |               |
| Interleukin-7                           | IL-7                | P13232            | SCI-Store (Russia)     | PSG240-10          | CHO           |
| Thymic stromal lymphopoietin            | TSLP                | Q969D9            | PeptoTech              | 300-62             | <i>E.coli</i> |
| Chorionic somatomammotropin hormone 1   | PL                  | P0DML2            | R&D Systems            | 5757-PL/CF         | CHO           |
| Interleukin-6 <sup>#</sup>              | IL-6                | P05231            | PeptoTech              | 200-06             | <i>E.coli</i> |
| Leukemia inhibitory factor <sup>#</sup> | LIF                 | P15018            | PeptoTech              | 300-05             | <i>E.coli</i> |
| Interleukin-12                          | IL-12               | P29459* & P29460  | PeptoTech              | 200-12H            | HEK293        |
| Interleukin-23                          | IL-23               | Q9NPF7* & P29460  | PeptoTech              | 200-23             | Hi-5          |
| <i>Interferons/IL-10</i>                |                     |                   |                        |                    |               |
| Interferon $\alpha$ -2                  | IFN- $\alpha$ 2     | P01563            | Vector-Medica (Russia) | n/a                | <i>E.coli</i> |

|                     |               |        |                        |     |               |
|---------------------|---------------|--------|------------------------|-----|---------------|
| Interferon $\gamma$ | IFN- $\gamma$ | P01579 | Pharmaclon<br>(Russia) | n/a | <i>E.coli</i> |
|---------------------|---------------|--------|------------------------|-----|---------------|

# ref. [1]

\* denotes the chain used for SCOP 2 [2] family assignment

n/a, not applicable

**Table S2.** The concentrations of four-helical cytokines under normal and pathological conditions.

| Cytokine              | Condition                              | Liquid | Detected level                                     |                                                            |                      |                     | Reference |
|-----------------------|----------------------------------------|--------|----------------------------------------------------|------------------------------------------------------------|----------------------|---------------------|-----------|
|                       |                                        |        | Disease                                            |                                                            | Healthy control      |                     |           |
|                       |                                        |        | pg/ml                                              | pM                                                         | pg/ml                | pM                  |           |
| Short-chain cytokines |                                        |        |                                                    |                                                            |                      |                     |           |
| GM-CSF                | Axial spondyloarthritis                | Serum  | 150                                                | 10.36                                                      | 62                   | 4.28                | [3]       |
|                       | Systemic sclerosis                     | Serum  | 120.9±125.5                                        | 8.29±8.67                                                  | 20.1±12.3            | 1.39±0.85           | [4]       |
|                       | Chronic myelogenous leukemia           | Serum  | 3.9-55                                             | 0.27-3.8                                                   | -                    | -                   | [5]       |
|                       | Rheumatoid arthritis                   | Plasma | 366±61<br>(severe)<br>376±44<br>(moderate)         | 25.27±4.2<br>2<br>(severe)<br>25.97±3.0<br>4<br>(moderate) | 174 ± 18             | 12.02±1.24          | [6]       |
|                       | Systemic lupus erythematosus           | Plasma | 256±41                                             | 17.67±2.8<br>3                                             |                      |                     |           |
|                       | Spondyloarthropathy                    | Plasma | 190±32                                             | 13.02±2.2<br>1                                             |                      |                     |           |
|                       | Relapsing-remitting multiple sclerosis | Serum  | 27.8±18.4<br>(relapse)<br>19.4±13.8<br>(remission) | 1.92±1.27<br>(relapse)<br>1.34±0.95<br>(remission)         | 17.9±13.3            | 1.24±0.91           | [7]       |
|                       | Healthy                                | Serum  | -                                                  | -                                                          | 38.3<br>(26.3–63.8)  | 2.64<br>(1.82-4.41) | [8]       |
| IL-3                  | Homozygous beta-thalassemia (children) | Plasma | 6.9±17.1                                           | 0.46±1.13                                                  | 0.2±0.5              | 0.013±0.033         | [9]       |
|                       | Healthy                                | Serum  | -                                                  | -                                                          | < 12                 | < 0.8               | [8]       |
|                       | Healthy                                | Serum  | -                                                  | -                                                          | 5.8 men<br>8.0 women | 0.38 men            | [10]      |

|      |                                       |        |                                                  |                                          |                             |                          |      |
|------|---------------------------------------|--------|--------------------------------------------------|------------------------------------------|-----------------------------|--------------------------|------|
|      |                                       |        |                                                  |                                          |                             | 0.53<br>women            |      |
|      | Chronic schizophrenia                 | Serum  | 27.0±19.7                                        | 1.79±1.31                                | 14.6±10.4                   | 0.97±0.69                | [11] |
| IL-5 | Healthy                               | Serum  | -                                                | -                                        | < 3.1                       | < 0.2                    | [8]  |
|      | Hepatocellular carcinoma              | Serum  | 10.97<br>(0.29–<br>17042.32)                     | 0.83<br>(0.02–<br>1.30)                  | -                           | -                        | [12] |
|      | Acute asthmatic attack                | Serum  | 4.84±1.68                                        | 0.37±0.13                                | 0.32±0.26                   | 0.024±0.020              | [13] |
|      | Asthma                                | Serum  | 9.5<br>(atopic)<br>8.1<br>(non-atopic)           | 0.72<br>(atopic)<br>0.62<br>(non-atopic) | 4.4                         | 0.33                     | [14] |
|      |                                       | Serum  | 0–46.75                                          | 0–3.56                                   | 0–5.20                      | 0–0.40                   | [15] |
|      | Chronic obstructive pulmonary disease | Serum  | 6.4±3.2                                          | 0.49±0.24                                | -                           | -                        | [16] |
| IL-9 | Hodgkin's lymphoma                    | Serum  | up to 3350                                       | up to 237                                | -                           | -                        | [17] |
|      | Healthy                               | Serum  | -                                                | -                                        | 113.6 men<br>573.3<br>women | 8.1 men<br>40.6<br>women | [10] |
|      | Rheumatoid arthritis                  | Serum  | 4.77±3.618                                       | 0.34±0.26                                | 1.22±0.706                  | 0.09±0.05                | [18] |
|      | Systemic lupus erythematosus          | Serum  | 12.26±25.235                                     | 0.87±1.79                                |                             |                          |      |
|      | Colon cancer                          | Plasma | 1.29                                             | 0.09                                     | 2.53                        | 0.18                     | [19] |
|      | Inflammatory bowel disease            | Serum  | 40±5                                             | 2.83±0.35                                | < 6                         | < 0.4                    | [20] |
|      | Diffuse large B-cell lymphoma         | Serum  | 1.43±0.64                                        | 0.10±0.05                                | 0.82±0.15                   | 0.06±0.01                | [21] |
|      | Allergic rhinitis                     | Serum  | 12.6<br>(5.03–24.11)<br>(exposed to<br>allergen) | 0.9<br>(0.3–1.7)                         | -                           | -                        | [22] |
|      |                                       |        | 4.83                                             | 0.3                                      |                             |                          |      |

|       |                                          |       |                                                                                                                      |                                     |                        |                      |      |
|-------|------------------------------------------|-------|----------------------------------------------------------------------------------------------------------------------|-------------------------------------|------------------------|----------------------|------|
|       |                                          |       | (1.97–14.01)<br>(not exposed to allergen)                                                                            | (0.1-1.0)                           |                        |                      |      |
|       | Systemic sclerosis                       | Serum | 84.6±76.0                                                                                                            | 5.99±5.39                           | 40.4±41.7              | 2.86±2.95            | [23] |
|       | Systemic lupus erythematosus             |       | 50.7±52.0                                                                                                            | 3.59±3.68                           |                        |                      |      |
|       | Dermatomyositis                          |       | 50.6±55.8                                                                                                            | 3.58±3.95                           |                        |                      |      |
|       | Atopic dermatitis                        |       | 41.8±38.8                                                                                                            | 2.96±2.75                           |                        |                      |      |
| IL-13 | Asthma                                   | Serum | 0–157.10                                                                                                             | 0–9.93                              | 0–5.40                 | 0–0.38               | [15] |
|       | Healthy                                  | Serum | -                                                                                                                    | -                                   | 11.2 men<br>14.1 women | 0.8 men<br>1.0 women | [10] |
|       | Insulin resistance                       | Serum | 37.69±17.82                                                                                                          | 2.38±1.13                           | 15.88±6.71             | 1.13±0.47            | [24] |
|       | Chronic rhinosinusitis with nasal polyps | Serum | 0.98±1.56                                                                                                            | 0.06±0.10                           | 0.34±0.16              | 0.024±0.011          | [25] |
|       | Acute asthmatic attack                   | Serum | 50.85±27.30                                                                                                          | 3.22±1.73                           | 8.10±5.40              | 0.57±0.38            | [13] |
|       | Ocular Behcet's disease                  | Serum | 38.7±59.6<br>(active ocular BD)<br>9.21±2.03<br>(ocular BD in remission)<br>10.3±1.65<br>(nonocular BD in remission) | 2.45±3.77<br>0.58±0.13<br>0.65±0.10 | 7.83±1.85              | 0.56±0.13            | [26] |
|       | Hepatocellular carcinoma                 | Serum | 38.425<br>(7.73–539.93)                                                                                              | 2.43<br>(0.49–34.14)                | -                      | -                    | [12] |
|       | Psoriatic arthritis                      | Serum | 2<br>(2–2)                                                                                                           | 0.13<br>(0.13–0.13)                 | 2 (2–6.2)              | 0.14 (0.14–0.44)     | [27] |

|       |                              |       |                                               |                     |            |             |      |
|-------|------------------------------|-------|-----------------------------------------------|---------------------|------------|-------------|------|
|       | Rheumatoid arthritis         |       | 10.2<br>(2–28.3)                              | 0.64<br>(0.13–1.79) |            |             |      |
|       | Osteoarthritis               |       | 2<br>(2–5.8)                                  | 0.13<br>(0.13–0.37) |            |             |      |
|       | Systemic sclerosis           | Serum | 0.84±0.65                                     | 0.05±0.04           | 0.35±0.18  | 0.025±0.012 | [28] |
| IL-15 | Polymyositis/dermatomyositis | Serum | 47.6±170<br>(active)                          | 3.73±13.3<br>1      | 28.5±28.89 | 2.5±2.3     | [29] |
|       |                              |       | 25.15±240<br>(inactive)                       | 1.97±18.7<br>9      |            |             |      |
|       | Healthy                      | Serum | -                                             | -                   | < 2.1      | < 0.16      | [8]  |
|       | Essential hypertension       | Serum | 88.7±18.7<br>(severe organ damage)            | 6.94±1.46           | -          | -           | [30] |
|       |                              |       | 55.2±6.9<br>(mild organ damage)               | 4.32±0.54           |            |             |      |
|       |                              |       | 51.0±8.3<br>(no organ damage)                 | 3.99±0.65           |            |             |      |
|       |                              |       |                                               |                     |            |             |      |
|       | Kawasaki disease             | Serum | 11.5±5.8<br>(acute stage)                     | 0.91±0.45           | 0.9 (1.0)  | 0.07 (0.08) | [31] |
|       |                              |       | 1.3±0.9<br>(subacute stage)                   | 0.10±0.07           |            |             |      |
|       | Prostate cancer              | Serum | 208.07±48.50<br>(early stage prostate cancer) | 16.28±3.7<br>9      | -          | -           | [32] |
|       |                              |       | 50.51±14.34<br>(benign prostatic hyperplasia) | 3.95±1.12           |            |             |      |

|       |                                         |       |                                                                                        |                                                               |                        |                     |      |
|-------|-----------------------------------------|-------|----------------------------------------------------------------------------------------|---------------------------------------------------------------|------------------------|---------------------|------|
|       | Multiple sclerosis                      | Serum | 4.2±1.36<br>5.56±3.6 (PPMS)<br>4.13±0.61 (RRMS)<br>4.26±0.73 (SPMS)<br>4.13±0.45 (IDS) | 0.33±0.10<br>0.44±0.28<br>0.33±0.05<br>0.34±0.06<br>0.33±0.04 | -                      | -                   | [33] |
|       | Inflammatory neurological diseases      |       | 1.95±0.41                                                                              | 0.16±0.03                                                     |                        |                     |      |
|       | Non-inflammatory neurological diseases  |       | 2.96±1.13                                                                              | 0.23±0.09                                                     |                        |                     |      |
|       | Ulcerative colitis (moderate to severe) | Serum | 0-490                                                                                  | 0-38                                                          | -                      | -                   | [34] |
|       | Hepatocellular carcinoma                | Serum | 77.4±78                                                                                | 6.06±6.11                                                     | -                      | -                   |      |
|       | Bacteremic melioidosis                  | Serum | 49.4<br>(12.4-338.8)                                                                   | 3.87<br>(0.98-26.52)                                          | 12.8 (< 8.2-122.2)     | 1.00 (< 0.64-9.57)  | [35] |
|       | Non-bacteremic melioidosis              | Serum | 31.3<br>(11.6-2743)                                                                    | 2.45<br>(0.91-214.74)                                         |                        |                     |      |
| IL-21 | Psoriasis                               | Serum | 68.86±32.13                                                                            | 4.31±2.01                                                     | 50.04±23.56            | 3.13±1.47           | [36] |
|       | Systemic lupus erythematosus            | Serum | 24.64<br>(21.15–28.46)                                                                 | 1.54<br>(1.32-1.78)                                           | 27.74<br>(23.28–34.64) | 1.73<br>(1.46-2.17) | [37] |
|       | Atopic dermatitis                       | Serum | 454<br>(up to 6 293)                                                                   | 28.39<br>(up to 394)                                          | 50.6                   | 3.16                | [38] |
|       | Chronic hepatitis B                     | Serum | 303.54±152.77                                                                          | 18.98±9.55                                                    | 68.24±9.06             | 4.27±0.57           | [39] |



|      |                                                                                             |       |                 |                   |           |           |      |
|------|---------------------------------------------------------------------------------------------|-------|-----------------|-------------------|-----------|-----------|------|
|      | Coronary artery disease                                                                     | Serum | 187.0±6.0       | 11.7±0.4          | 120.5±5.0 | 7.5±0.3   | [40] |
| THPO | Cirrhosis                                                                                   | Serum | 69±12           | 1.82±0.32         | 49±9      | 1.3±0.24  | [41] |
|      | Myelosuppression after intensification chemotherapy of acute leukemia in complete remission | Serum | -               | 18.46±9.70        | -         | 0.84±0.40 | [42] |
|      | Aplastic anemia                                                                             |       | -               | 16.03±9.44        |           |           |      |
|      | Acute lymphoblastic leukemia                                                                |       | -               | 10.36±5.57        |           |           |      |
|      | Malignant lymphoma                                                                          |       | -               | 2.79±2.27         |           |           |      |
|      | Multiple myeloma                                                                            |       | -               | 3.34±0.20         |           |           |      |
|      | Chronic lymphocytic leukemia                                                                |       | -               | 1.71±3.91         |           |           |      |
|      | Myeloproliferative disorders                                                                |       | -               | 1.99±1.47         |           |           |      |
|      | Acute myelogenous leukemia                                                                  |       | -               | 2.27±1.25         |           |           |      |
|      | Hypoplastic leukemia                                                                        |       | -               | 2.76±2.23         |           |           |      |
|      | Myelodysplastic syndrome                                                                    |       | -               | 0.42±0.60         |           |           |      |
|      | Liver cirrhosis                                                                             |       | -               | 1.50±0.92         |           |           |      |
|      | Idiopathic thrombocytopenic purpura                                                         |       | -               | 2.08±1.41         |           |           |      |
|      | Thrombocytopenia                                                                            | Serum | >500            | >14.1             | <100      | <2.8      | [43] |
|      | Ovarian cancer                                                                              | Serum | 114<br>(25–435) | 3.2<br>(0.7-12.3) | -         | -         | [44] |
|      | Benign ovarian disease                                                                      |       | 74<br>(34–189)  | 2.1<br>(1.0-5.3)  |           |           |      |
|      | Consumptive thrombocytopenia                                                                | Serum | 63<br>(48–98)   | 1.8<br>(1.4-2.8)  | 7–99      | 0.2-2.8   | [45] |

|                             |                                            |       |                                                                                                             |                                                         |                               |                          |      |
|-----------------------------|--------------------------------------------|-------|-------------------------------------------------------------------------------------------------------------|---------------------------------------------------------|-------------------------------|--------------------------|------|
|                             | Hypoproliferative thrombocytopenia         |       | 706<br>(358–1546)                                                                                           | 19.9<br>(10.1-43.6)                                     |                               |                          |      |
| <i>Long-chain cytokines</i> |                                            |       |                                                                                                             |                                                         |                               |                          |      |
| IL-31                       | Paediatric atopic dermatitis               | Serum | 1600<br>(1457.8±770.4) (flare)<br>1040<br>(958.7±419.5)<br>)<br>(quiescence)                                | 101<br>(92±49)<br>66<br>(61±26)                         | 220<br><br>(197.3±91.9)       | 14<br><br>(12±6)         | [46] |
|                             | Osteoporosis                               | Serum | 43.12±6.97                                                                                                  | 2.72±0.44                                               | 29.58±6.09                    | 1.86±0.38                | [47] |
|                             | Early axial spondyloarthritis              | Serum | 12.6±15.4                                                                                                   | 0.79±0.98                                               | 1.8±4.0                       | 0.11±0.25                | [48] |
|                             | Chronic kidney disease-associated pruritus | Serum | 679.9±1112.3                                                                                                | 42.9±70.2                                               | 57.3±65.1                     | 3.6±4.1                  | [49] |
|                             | Atopic dermatitis                          | Serum | up to 10 000                                                                                                | up to 631                                               | up to 1 200                   | up to 76                 | [50] |
|                             | Endometrial cancer                         | Serum | 165.80±39.03<br>(94.43–240.65)<br>(before operation)<br>128.91±29.48<br>(53.54–187.54)<br>(after operation) | 10.47±2.46<br>(5.97-15.20)<br>8.14±1.86<br>(3.38-11.84) | 77.24±25.85<br>(32.50–142.82) | 4.87±1.63<br>(2.05-9.02) | [51] |
| IL-27                       | Systemic sclerosis                         | Serum | 302.8<br>(101.6-1034.4)<br>385<br>(109-826.3)                                                               | 6.33<br>(2.12-21.62)<br>8.05<br>(2.28-17.27)            | 104.2<br>(51-184.2)           | 2.18<br>(1.06-3.85)      | [52] |
|                             | Chronic HIV-1 Infection                    | Serum | 2<br>008.0±274.8                                                                                            | 42.0±5.7                                                |                               |                          | [53] |

|  |                                   |       |                                                                                                                               |                                                 |                      |               |      |
|--|-----------------------------------|-------|-------------------------------------------------------------------------------------------------------------------------------|-------------------------------------------------|----------------------|---------------|------|
|  |                                   |       | ( $<50$ copies/ml group)                                                                                                      | $30.7\pm3.6$                                    |                      |               |      |
|  |                                   |       | 1<br>$468.7\pm172.3$                                                                                                          | $25.9\pm2.7$                                    |                      |               |      |
|  |                                   |       | ( $51-10\ 000$ copies group)                                                                                                  | $33.2\pm4.7$                                    | 2<br>$990.7\pm682.1$ | $62.5\pm14.3$ |      |
|  |                                   |       | 1<br>$237.9\pm127.3$<br>( $10\ 001-100\ 000$ copies/ml group)                                                                 |                                                 |                      |               |      |
|  | Childhood immune thrombocytopenia | Serum | 1<br>$590.1\pm223.7$<br>( $>100\ 000$ copies/ml group)                                                                        |                                                 |                      |               |      |
|  |                                   |       |                                                                                                                               |                                                 |                      |               |      |
|  | Ocular Behcet's disease           | Serum | $320\pm57.5$<br>(active ocular BD)<br>$316\pm47.3$<br>(ocular BD in remission)<br>$305\pm32.4$<br>(nonocular BD in remission) | $6.69\pm1.20$<br>$6.60\pm0.98$<br>$6.38\pm0.67$ | $347\pm50.1$         | $7.25\pm1.05$ | [26] |
|  | Ischemic heart disease            | Serum | $38.00\pm14.38$<br>(acute myocardial infarction)<br>$35.77\pm18.93$<br>(unstable angina)                                      | $0.80\pm0.30$<br>$0.75\pm0.40$                  | $24.91\pm14.96$      | $0.52\pm0.31$ | [55] |

|       |                                                |       |                                                                         |                                                                               |                                                   |                                                  |      |
|-------|------------------------------------------------|-------|-------------------------------------------------------------------------|-------------------------------------------------------------------------------|---------------------------------------------------|--------------------------------------------------|------|
|       | Diabetic retinopathy                           | Serum | 240.900<br>(42.224–617.810)                                             | 5.0<br>(0.9-12.9)                                                             | 2 712.310<br>(1 005.375–5 786.877)                | 56.68<br>(21-120)                                | [56] |
|       | Type 1 diabetes mellitus                       | Serum | 22.06                                                                   | 0.46                                                                          | 14.5                                              | 0.30                                             | [57] |
|       | Type 1 diabetes mellitus + Hashimoto's disease |       | 27.82                                                                   | 0.59                                                                          |                                                   |                                                  |      |
|       | Healthy                                        | Serum | -                                                                       | -                                                                             | Most 100-1 000<br>Minority >2 000<br>4.4% > 6 000 | Most 2.1-20.9<br>Minority > 41.8<br>4.4% > 125.4 | [58] |
| IL-35 | Pre-eclampsia                                  | Serum | 729±335                                                                 | 15.90±7.31                                                                    | 483.9±242                                         | 10.55±5.28                                       | [59] |
|       | Gastric cancer                                 | Serum | 17.559±13.266                                                           | 0.38±0.29                                                                     | 8.077±3.801                                       | 0.18±0.08                                        | [60] |
|       | Prostate cancer                                | Serum | 20.01±7.03                                                              | 0.44±0.15                                                                     | 11.60±2.49                                        | 0.25±0.05                                        | [61] |
|       | Rheumatoid arthritis                           | Serum | 12.9<br>(6.4-16.9)                                                      | 0.28<br>(0.14-0.37)                                                           | 6.7<br>(4.3-12.2)                                 | 0.15<br>(0.09-0.27)                              | [62] |
|       | Multiple sclerosis                             | Serum | 49.3±3.7                                                                | 1.08±0.08                                                                     | 69.5±7.8                                          | 1.52±0.17                                        | [63] |
|       | Systemic sclerosis                             | Serum | 83.9<br>(45.1–146.1)                                                    | 1.83<br>(0.98-3.19)                                                           | 36.2<br>(17.2–49.4)                               | 0.79<br>(0.38-1.08)                              | [64] |
|       | Systemic sclerosis                             | Serum | 5.08±0.76<br>7.75±1.36<br>(fibrosis)<br>3.08±0.70<br>(without fibrosis) | 0.111±0.017<br>0.169±0.030<br>(fibrosis)<br>0.067±0.015<br>(without fibrosis) | 1.89±0.69                                         | 0.041±0.015                                      | [65] |
| G-CSF | Healthy                                        | Serum | -                                                                       | -                                                                             | 45.5                                              | 2.4                                              | [8]  |

|    |                              |       |                             |                          |                                                                                               |                                  |      |
|----|------------------------------|-------|-----------------------------|--------------------------|-----------------------------------------------------------------------------------------------|----------------------------------|------|
|    |                              |       |                             |                          | (34–53.6)                                                                                     | (1.8–2.80)                       |      |
|    | Healthy                      | Serum | -                           | -                        | 70.3 men<br>93.7 women                                                                        | 3.7 men<br>4.9 women             | [10] |
|    | Acute stage of infection     | Serum | 731.8±895.0<br>(30-3 199)   | 38.6±47.1<br>(1.6-168.5) | 25.3±19.7<br>< 100 in all cases                                                               | 1.33±1.03<br>< 5.27 in all cases | [66] |
|    | Breast cancer                | Serum | 92.81±594.54                | 4.88±31.3<br>1           | 0.00                                                                                          | 0.00                             | [67] |
|    | Acute bacterial infection    | Serum | 799±1 501                   | 42±79                    | -                                                                                             | -                                | [68] |
|    | Viral infection              |       | 58±34                       | 3.1±1.8                  |                                                                                               |                                  |      |
|    | Atypical pneumonia           |       | 60±33                       | 3.2±1.7                  |                                                                                               |                                  |      |
|    | Chronic myelogenous leukemia | Serum | 150-2 830                   | 7.9-149.1                | -                                                                                             | -                                | [5]  |
|    | Urothelial carcinoma         | Serum | 147                         | 7.74                     | < 37                                                                                          | 1.95                             | [69] |
|    | Various disorders            | Serum | 46 to > 2 000               | 2.4 to >105.3            | < 30 to 163                                                                                   | <1.6 to 8.6                      | [70] |
|    | Septic shock after surgery   | Serum | up to 20 000                | up to 1050               | <100                                                                                          | < 5.27                           | [71] |
| GH | Gastric cancer               | Serum | 3 140±3 120<br>(200-10 900) | 142±141<br>(9-493)       | 690±1 600<br>(100-9 000)                                                                      | 31±72<br>(4.5-406.7)             | [72] |
|    | Colorectal cancer            |       | 3 010±2 910<br>(200-9 900)  | 136±132<br>(9-447)       |                                                                                               |                                  |      |
|    | Healthy                      | Serum | -                           | -                        | 400-10 000<br>(adult males)<br>1 000-14 000<br>(adult females)<br>10 000-50 000<br>(children) | 18-452<br>45-633<br>452-2 260    | [73] |
|    | Acromegaly                   | Serum | ≥ 1 000                     | ≥45                      | <1 000                                                                                        | < 45                             | [74] |

|      |                         |                |                          |                      |                                                                                                                                                                                                              |                                                                                                                                                                                                                    |      |
|------|-------------------------|----------------|--------------------------|----------------------|--------------------------------------------------------------------------------------------------------------------------------------------------------------------------------------------------------------|--------------------------------------------------------------------------------------------------------------------------------------------------------------------------------------------------------------------|------|
|      | Healthy                 | Serum          | -                        | -                    | 2 400±2 800<br>(boys)<br>2 500±3 100<br>(girls)                                                                                                                                                              | 108±127<br>113±140                                                                                                                                                                                                 | [75] |
| GH-V | Down syndrome pregnancy | Maternal serum | -                        | -                    | 531<br>(8 <sup>th</sup> week)<br>935<br>(9 <sup>th</sup> week)<br>962<br>(10 <sup>th</sup> week)<br>1 103<br>(11 <sup>th</sup> week)<br>1 204<br>(12 <sup>th</sup> week)<br>1 169<br>(13 <sup>th</sup> week) | 23.79<br>(8 <sup>th</sup> week)<br>41.89<br>(9 <sup>th</sup> week)<br>43.10<br>(10 <sup>th</sup> week)<br>49.42<br>(11 <sup>th</sup> week)<br>53.94<br>(12 <sup>th</sup> week)<br>52.37<br>(13 <sup>th</sup> week) | [76] |
|      | Pre-eclampsia           | Maternal serum | 23 076<br>(3 473-94 256) | 1 030<br>(156-4 220) | 12 157<br>(2 617-34 016)                                                                                                                                                                                     | 545<br>(117-1 520)                                                                                                                                                                                                 | [77] |
| PRL  | Healthy                 | Serum          | -                        | -                    | < 20 000<br>(men)<br>< 25 000<br>(nonpregnant women)<br>80 000-40 000<br>(pregnant women)                                                                                                                    | < 870<br>(men)<br>< 1 090<br>(nonpregnant women)<br>3 490-17 470<br>(pregnant women)                                                                                                                               | [27] |
|      | Phenylketonuria         | Serum          | 12 000<br>(3 000–75 000) | 524<br>(131-3 280)   | 1 400–24 000<br>(females)<br>1 600–10 700                                                                                                                                                                    | 61-1 050<br>(females)<br>70-467<br>(males)                                                                                                                                                                         | [78] |

|     |                               |       |                                                                                |                                      |                                           |                                      |      |
|-----|-------------------------------|-------|--------------------------------------------------------------------------------|--------------------------------------|-------------------------------------------|--------------------------------------|------|
|     |                               |       |                                                                                |                                      | (males)                                   |                                      |      |
|     | Systemic lupus erythematosus  | Serum | 17 400±15 100                                                                  | 760±660                              | 6 300±3 200                               | 275±140                              | [79] |
|     | Rheumatic autoimmune diseases |       | 13 100±10 300                                                                  | 572±450                              |                                           |                                      |      |
|     | Psoriasis                     | Serum | 11 290±8 050 (3 800-39 600)                                                    | 493±352 (166-1 730)                  | 7 900±3 930 (2 800-18 600)                | 345±172 (122-812)                    | [80] |
|     | Breast cancer                 | Serum | 5 000–77 900                                                                   | 218-3 400                            | <20 000                                   | <873                                 | [81] |
|     | Type 2 diabetes mellitus      | Serum | 36 840±6 290                                                                   | 1 610±275                            | 10 660±2 450                              | 466±107                              | [82] |
| LEP | Asthma                        | Serum | 13 810±10 560                                                                  | 862±659                              | 6 320±5 200                               | 394±324                              | [83] |
|     | Multiple sclerosis            | Serum | -                                                                              | 50-6250                              | -                                         | -                                    | [84] |
|     | Multiple sclerosis            | Serum | 11 135±6 453 (RRMS)                                                            | 695±403                              | -                                         | -                                    | [85] |
|     |                               |       | 30 258±14 435 (SPMS)                                                           | 1 890±901                            |                                           |                                      |      |
|     |                               |       | 30 301±12 709 (PPMS)                                                           | 1 890±793                            |                                           |                                      |      |
|     | Non-small cell lung cancer    | Serum | 8 500±1 600<br>10 700±2 500 (without weight loss)<br>7 200±2 100 (weight loss) | 530±100<br>668±156<br>449±131        | 12 800±2 400                              | 799±150                              | [86] |
|     | Obesity                       | Serum | 44 920±26 490 (women)<br>15 150±9 500 (men)                                    | 2 800±1 650 (women)<br>945±593 (men) | 21 810±17 110 (women)<br>7310±5080 (men)  | 1 360±1 070 (women)<br>456±317 (men) | [87] |
|     | Obesity                       |       | 11 390±8 790 (boys)<br>12 640±9 330 (girls)                                    | 711±549 (boys)<br>789±582 (girls)    | 4 800±5 250 (boys)<br>4 810±4 430 (girls) | 300±328 (boys)<br>300±276 (girls)    | [88] |

| Interferons/IL-10 |                              |        |                        |                     |                        |                     |      |
|-------------------|------------------------------|--------|------------------------|---------------------|------------------------|---------------------|------|
| IL-10             | Healthy                      | Serum  | -                      | -                   | 12.6<br>(8.5–16.7)     | 0.68<br>(0.46-0.90) | [8]  |
|                   | Healthy                      | Serum  | -                      | -                   | 2.7                    | 0.14                | [10] |
|                   | Melanoma                     | Serum  | 15–480                 | 0.80-25.74          | <3.0                   | <0.16               | [89] |
|                   |                              |        | 8.75                   | 0.47                | <3.0                   | <0.16               |      |
|                   | Gastric cancer               |        | 27.52                  | 1.48                | <12                    | <0.64               |      |
|                   |                              |        | >21.0                  | >1.13               | <3.0                   | <0.16               |      |
|                   | Pancreatic cancer            |        | >10.0                  | >0.54               | N/D                    | <0.16               |      |
|                   |                              |        | >9.8                   | >0.53               | 3.0                    | 0.16                |      |
|                   | Colorectal cancer            |        | 97.36                  | 5.22                | 24.53                  | 1.32                |      |
|                   |                              |        | 16.09                  | 0.86                | 5.1                    | 0.27                |      |
|                   | Hepatic cancer               |        | 12                     | 0.64                | 6.3                    | 0.34                |      |
|                   | Hodgkin lymphoma             |        | >10                    | >0.54               | 7.1                    | 0.38                |      |
|                   | Non-Hodgkin lymphoma         |        | >7.98                  | >0.43               | <5.0                   | <0.28               |      |
|                   | Lung cancer                  |        | >38.16                 | >2.05               | 32.55                  | 1.75                |      |
|                   |                              |        | 21.4                   | 1.15                | 9.2                    | 0.49                |      |
|                   | B-cell lymphoma              |        | 26.0                   | 1.39                | 18.0                   | 0.97                |      |
|                   | Chronic lymphocytic leukemia |        | 74                     | 3.97                | <13.68                 | <0.73               |      |
|                   | Psoriasis                    | Serum  | 89.5±18.7              | 4.8±1               | 117.2±23.4             | 6.29±1.25           | [90] |
| IL-20             | Rheumatoid arthritis         | Serum  | 30.2<br>(19.1–58.5)    | 1.72<br>(1.09-3.34) | 13.1<br>(11–15.1)      | 0.75<br>(0.63-0.86) | [91] |
|                   | Psoriasis                    | Serum  | 20.418±20.58<br>7      | 1.16±1.17           | 2.703±3.043            | 0.15±0.17           | [92] |
|                   | Non–small cell lung cancer   | Serum  | 40.35<br>(29.86-63.81) | 2.30<br>(1.70-3.64) | 37.73<br>(32.49-50.80) | 2.15<br>(1.85-2.90) | [93] |
|                   | Rheumatoid arthritis         | Plasma | 282<br>(134–438)       | 16.09               | -                      | -                   | [94] |



|       |                                            |        |                           |                       |                      |                     |       |
|-------|--------------------------------------------|--------|---------------------------|-----------------------|----------------------|---------------------|-------|
|       |                                            |        |                           | (7.65-24.99)          |                      |                     |       |
|       | Osteoarthritis                             |        | 124<br>(110–147)          | 7.07<br>(6.28-8.39)   |                      |                     |       |
|       | Rheumatoid arthritis                       | Plasma | 89<br>(45–643)            | 5.08<br>(2.57-36.69)  | 71<br>(40–80)        | 4.05<br>(2.28-4.56) | [95]  |
|       | Systemic sclerosis                         | Serum  | 56.89±11.6                | 3.25±0.66             | 79.11±18.2           | 4.51±1.04           | [96]  |
|       | Primary Raynaud's phenomenon               |        | 71.42±11.8                | 4.07±0.67             |                      |                     |       |
| IL-22 | Psoriasis                                  | Serum  | 71.600±150.7<br>59        | 4.27±9.00             | 2.358±2.486          | 0.14±0.15           | [92]  |
|       | Non–small cell lung cancer                 | Serum  | 10.66<br>(1.44-70.34)     | 0.64<br>(0.09-4.20)   | 4.69<br>(0.35-12.29) | 0.28<br>(0.02-0.73) | [93]  |
|       | Systemic sclerosis                         | Serum  | 68.3±44.4                 | 4.09±2.65             | 59.52±16.7           | 3.55±1.00           | [96]  |
|       | Primary Raynaud's phenomenon               |        | 63.1±11.8                 | 3.77±0.70             |                      |                     |       |
|       | Epithelial ovarian cancer                  | Plasma | 34.19±4.58                | 2.04±0.27             | 22.1±1.71            | 1.32±0.10           | [97]  |
|       | Benign ovarian epithelial neoplasm         |        | 23.1±1.78                 | 1.38±0.11             |                      |                     |       |
|       | Hepatocellular carcinoma                   | Serum  | 299.675<br>(5.99–1963.32) | 17.89<br>(0.36-117.2) | -                    | -                   | [12]  |
|       | Multiple myeloma                           | Serum  | 75.5±63.3                 | 4.51±3.78             | 8.1±5.7              | 0.48±0.34           | [98]  |
|       | Low-grade squamous intraepithelial lesion  | Serum  | 168.2                     | 10.0                  | 36.91                | 2.20                | [99]  |
|       | High-grade squamous intraepithelial lesion |        | 61.48                     | 3.67                  |                      |                     |       |
|       | Breast cancer                              | Serum  | 317.53±14.33              | 18.96±0.8<br>6        | 62.67±19.11          | 3.74±1.14           | [100] |

|                 |                                      |        |                                                      |                         |                           |                       |       |
|-----------------|--------------------------------------|--------|------------------------------------------------------|-------------------------|---------------------------|-----------------------|-------|
|                 | Type 2 autoimmune hepatitis          | Serum  | 55.26                                                | 3.3                     | 0.1                       | 0.006                 | [101] |
| IL-24           | Rheumatoid arthritis                 | Plasma | 2 210 (310–7290)                                     | 122 (17–401)            | 80 (0–3630)               | 4.4 (0–200)           | [94]  |
|                 | Spondyloarthritis                    |        | 2 020 (0–6830)                                       | 111 (0–376)             |                           |                       |       |
|                 | Breast cancer                        | Serum  | 160.65±55                                            | 8.84±3.03               | 27.4±8.5                  | 1.51±0.47             | [102] |
|                 | Gastric cancer + H. Pylori infection |        | 76.2±16.27                                           | 4.2±0.9                 |                           |                       |       |
|                 | Gastric cancer                       |        | 72.5±17.84                                           | 3.99±0.98               |                           |                       |       |
|                 | H. Pylori infection                  |        | 32.78±12.96                                          | 1.8±0.71                |                           |                       |       |
|                 | Systemic lupus erythematosus         | Serum  | 1 375.70<br>(812.92–2 096.54)                        | 75.76<br>(44.76–115.45) | 334.70<br>(129.13–634.91) | 18.43<br>(7.11–34.96) | [103] |
| IL-26           | Systemic lupus erythematosus         | Serum  | 4 040±11 660                                         | 230±663                 | 740±2 020                 | 42±115                | [104] |
|                 | Neurosyphilis                        | Serum  | 6870                                                 | 391                     | 1670                      | 95                    | [105] |
|                 | Severe asthma                        | Serum  | 1 100±390                                            | 63±22                   | 550±250                   | 31±14                 | [106] |
|                 | Behçet's disease                     | Serum  | 4 800±1 320<br>(active)<br>2 770±1 026<br>(inactive) | 273±75<br>158±58        | 310±140                   | 18±8                  | [107] |
|                 | Rheumatoid arthritis                 | Serum  | 2 430±3 800                                          | 138±216                 | 30±40                     | 1.71±2.27             | [108] |
|                 | Other inflammatory arthritis         | Serum  | 8 820±16 320                                         | 502±928                 | 30±40                     | 1.71±2.27             |       |
|                 |                                      |        |                                                      |                         |                           |                       |       |
| IFN- $\omega$ 1 | Dermatomyositis                      | Serum  | 0–120                                                | 0–5.95                  | 0–60                      | 0–2.98                | [109] |

**Table S3.** The structures (PDB [110] entries or AlphaFold2 [111] predictions) of the human cytokines used for structural modelling of their complexes with Ca<sup>2+</sup>-loaded human S100P dimer (chains B, D of PDB entry 2MJW) using ClusPro docking server [112].

| <i>Cytokine</i>              | <i>PDB entry</i> | <i>Chain</i> | <i>Method</i> | <i>Comments</i>                                                                                                    |
|------------------------------|------------------|--------------|---------------|--------------------------------------------------------------------------------------------------------------------|
| <i>Short-chain cytokines</i> |                  |              |               |                                                                                                                    |
| GM-CSF                       | 1CSG             | A            | X-ray         |                                                                                                                    |
| IL-3                         | 6NMY             | I            | X-ray         | W6Y substitution; complex with the receptor chains                                                                 |
| IL-5                         | 1HUL             | A            | X-ray         | dimeric structure                                                                                                  |
| IL-9                         | -                | -            | AlphaFold2    |                                                                                                                    |
| IL-13                        | 1GA3             | A            | NMR           |                                                                                                                    |
| IL-15                        | 4GS7             | A            | X-ray         | complex with the receptor chains                                                                                   |
| IL-21                        | 2OQP             | A            | NMR           |                                                                                                                    |
| THPO                         | 1V7M             | V            | X-ray         | complex with a neutralizing antibody fragment; only structured fragment of the protein 22-184 was used for docking |
| <i>Long-chain cytokines</i>  |                  |              |               |                                                                                                                    |
| IL-31                        | -                | -            | AlphaFold2    |                                                                                                                    |
| G-CSF                        | 1GNC             | A            | NMR           |                                                                                                                    |
| GH                           | -                | -            | AlphaFold2    |                                                                                                                    |
| GH-V                         | -                | -            | AlphaFold2    |                                                                                                                    |
| PRL                          | 1RW5             | A            | NMR           |                                                                                                                    |
| LEP                          | 1AX8             | A            | X-ray         | W100A substitution                                                                                                 |
| <i>Interferons/IL-10</i>     |                  |              |               |                                                                                                                    |
| IL-10                        | 2ILK             | A            | X-ray         |                                                                                                                    |

|                 |      |   |            |                                                                           |
|-----------------|------|---|------------|---------------------------------------------------------------------------|
| IL-20           | 4DOH | A | X-ray      | complex with the receptor chains                                          |
| IL-22           | 1M4R | A | X-ray      |                                                                           |
| IL-24           | 6DF3 | C | X-ray      | N34Q, N48Q, Y73H, N75Q substitutions;<br>complex with the receptor chains |
| IL-26           | -    | - | AlphaFold2 |                                                                           |
| IFN- $\omega$ 1 | 3SE4 | B | X-ray      | N83Q substitution; complex with the<br>receptor chains                    |

**Table S4.** The residues of the binding sites for the S100P-cytokine complexes predicted using ClusPro docking server [112]. The contact residues included into 5 or more docking models were considered as the most probable residues of the binding site. The numbering of the residues is according to the PDB entries. The residues of receptor-binding sites of the cytokines are shown in bold. The following receptors are taken into account: GM-CSF receptor subunit  $\alpha$  (PDB entry 4RS1), IL-3 receptor subunit  $\alpha$  (PDB ID: 5UV8), IL-5 receptor subunit  $\alpha$  (PDB ID: 3VA2), IL-15 receptor subunits  $\alpha$ ,  $\beta$  and  $\gamma$  (PDB ID: 4GS7), IL-21 receptor (PDB ID: 3TGX), G-CSF receptor (PDB ID: 2D9Q), GH receptor (PDB ID: 3HHR), IL-20 receptor subunits  $\alpha$  and  $\beta$  (PDB ID: 4DOH), IFN- $\alpha/\beta$  receptors 1 and 2 (PDB ID: 3SE4).

| <i>Short-chain cytokines</i> |                          |                                                                   |
|------------------------------|--------------------------|-------------------------------------------------------------------|
| <b>S100P dimer</b>           |                          | <b>GM-CSF</b>                                                     |
| Chain B                      | Chain D                  |                                                                   |
| P42,G43,F44,Y88,F89          | M1,T2,E5,G9,D13,R17      | Q11,W13,E14,V16,N17,Q20,E21,R23,R24,L28,K72,<br><b>L115,F119</b>  |
| <b>S100P dimer</b>           |                          | <b>IL-3</b>                                                       |
| Chain B                      | Chain D                  |                                                                   |
| G43,Y88,F89,A92              | M1,E5                    | Y13, <b>S17,R43</b> ,L82,P83,C84,L85,P86,L87,A88,T89, <b>N120</b> |
| <b>S100P dimer</b>           |                          | <b>IL-5</b>                                                       |
| Chain B                      | Chain D                  |                                                                   |
| E40, P42,G43,C85,Y88,F89,A92 | M1,T2,E5                 | T19, <b>L20</b> ,A23,N24,Q54,V56,Q57                              |
| <b>S100P dimer</b>           |                          | <b>IL-9</b>                                                       |
| Chain B                      | Chain D                  |                                                                   |
| E3,C85,Y88,F89               | M1,E5,G9,I12,D13,S16,R17 | C3,Q115,K118,M122,R123,K125,I126                                  |
| <b>S100P dimer</b>           |                          | <b>IL-13</b>                                                      |
| Chain B                      | Chain D                  |                                                                   |
| G43,F44,C85,F89              | E5                       | P15,S16,T17,R74,G78,S90,N126                                      |
| <b>S100P dimer</b>           |                          | <b>IL-15</b>                                                      |
| Chain B                      | Chain D                  |                                                                   |

|                                    |                                        |                                                                                                                |
|------------------------------------|----------------------------------------|----------------------------------------------------------------------------------------------------------------|
| M1,E5,P42,F44,Y88,F89              | M1,T2,E5,F44,Y88,F89,A92               | N1,W2,V3,K10, <b>D30,H32</b> ,P33,K36,S76,N77,N79,V80,T81,H105, <b>Q108</b> ,M109, <b>I111,N112</b> ,T113,S114 |
| <b>S100P dimer</b>                 |                                        | <b>IL-21</b>                                                                                                   |
| Chain B                            | Chain D                                |                                                                                                                |
| M1,T2,E3,E5,T6,D13,R17,E40,Y88,G93 | M1,T2,E3,E5,T6,M10,D13,S16,R17,E40,F89 | M5,Q6,G7,Q8,D9, <b>R10</b> ,H11, <b>R14</b> ,N46,W51, <b>R81,P84,S85</b> ,R90,R91,H94,R95,H127,L128,S129,R131  |
| <b>S100P dimer</b>                 |                                        | <b>THPO</b>                                                                                                    |
| Chain B                            | Chain D                                |                                                                                                                |
| E3,R17,Y88,F89,A92,G93,L94         | M1,E5,D13,S16,R17,T25,Q26              | S7,R11,H14,H17,V38,F40,S41,L42,H115,L123,R130,R134,F135,L138                                                   |
| <i>Long-chain cytokines</i>        |                                        |                                                                                                                |
| <b>S100P dimer</b>                 |                                        | <b>IL-31</b>                                                                                                   |
| Chain B                            | Chain D                                |                                                                                                                |
| F44,Q46,C85,Y88,F89                | E5                                     | S1,H2,L4,P5,V6,R7,L9,R10,P11,D53,Q55,P56,N58,F93,Q94,D95                                                       |
| <b>S100P dimer</b>                 |                                        | <b>G-CSF</b>                                                                                                   |
| Chain B                            | Chain D                                |                                                                                                                |
| G43,F44,C85,Y88,F89,A92            | M1,E5,I12,G43,F44,F89                  | Q71,L72,A73, <b>Q120</b> ,Q121,E123, <b>E124</b> ,L169                                                         |
| <b>S100P dimer</b>                 |                                        | <b>GH</b>                                                                                                      |
| Chain B                            | Chain D                                |                                                                                                                |
| M1,E5,G43,F44,C85,Y88,F89          | M1,E5,P42,G43,Y88,F89                  | D11, <b>L15,H18,Q22,R64</b> ,Q68, <b>R178</b> ,I179,C182,R183,E184,G187,S188, <b>C189,G190</b> ,F191           |
| <b>S100P dimer</b>                 |                                        | <b>GH-V</b>                                                                                                    |
| Chain B                            | Chain D                                |                                                                                                                |
| D13,F44,Y88                        | F44                                    | F1,P2,T3,I4,R8,N12,R16,R112,D116,E119,Q122,T123,W126,R127,D130,Q137                                            |
| <b>S100P dimer</b>                 |                                        | <b>PRL</b>                                                                                                     |
| Chain B                            | Chain D                                |                                                                                                                |
| L41,F44,I81,C85,Y88,F89            | E5                                     | L1,I3,C4,G6,G7,A9,R10,C11,Q12,V13,T14,R16,D17,D20,R21,R125,E128,K190,I194,H195                                 |

| S100P dimer             |                        | LEP                                                                                                             |
|-------------------------|------------------------|-----------------------------------------------------------------------------------------------------------------|
| Chain B                 | Chain D                |                                                                                                                 |
| C85,Y88,F89             | M1,E5,D13              | V1,I3,D85,H88,F92,S93,K94,S95,C96,H97,L98,C146                                                                  |
| Interferons/IL-10       |                        |                                                                                                                 |
| S100P dimer             |                        | IL-10                                                                                                           |
| Chain B                 | Chain D                |                                                                                                                 |
| E5,Y88,F89,G93,L94      | D13,Y88,F89            | Q70,K117,S118,A120,V121,K125,M140,F143,F146,<br>Y149,I150,Y153,M154,I158                                        |
| S100P dimer             |                        | IL-20                                                                                                           |
| Chain B                 | Chain D                |                                                                                                                 |
| E5,M8,Y88,F89           | E5,F44,C85,Y88,F89     | S9,V11,R60,R64, <b>K97</b> ,D98,R100,H103,A104,H105,<br>M106,T107,C108,H109,C110                                |
| S100P dimer             |                        | IL-22                                                                                                           |
| Chain B                 | Chain D                |                                                                                                                 |
| P42,G43,F44,C85,Y88,F89 | M1,T2,E5               | H6,F47,H48,G49,M52,S53,E54,R55,D104,N143,A14<br>4,I146                                                          |
| S100P dimer             |                        | IL-24                                                                                                           |
| Chain B                 | Chain D                |                                                                                                                 |
| F44,I81,C85,Y88,F89     | M1,T2,E5,D13           | Y56,H59,T60,P102,Q104,N106,F109,S110,R112,D11<br>3,H116,R117,L120,R124,K127,Q128                                |
| S100P dimer             |                        | IL-26                                                                                                           |
| Chain B                 | Chain D                |                                                                                                                 |
| P42,G43,C85,Y88,F89     | M1,T2,E5,G9,D13        | Y12,S102                                                                                                        |
| S100P dimer             |                        | IFN- $\omega$ 1                                                                                                 |
| Chain B                 | Chain D                |                                                                                                                 |
| E5,M8,Y88,F89           | E5,G43,F44,C85,Y88,F89 | <b>R14,H21</b> ,Q22,R24,R25,I26,S27, <b>P28,F29</b> ,L30,K33, <b>R3<br/>5</b> ,D140,R147, <b>M148,M151,F155</b> |

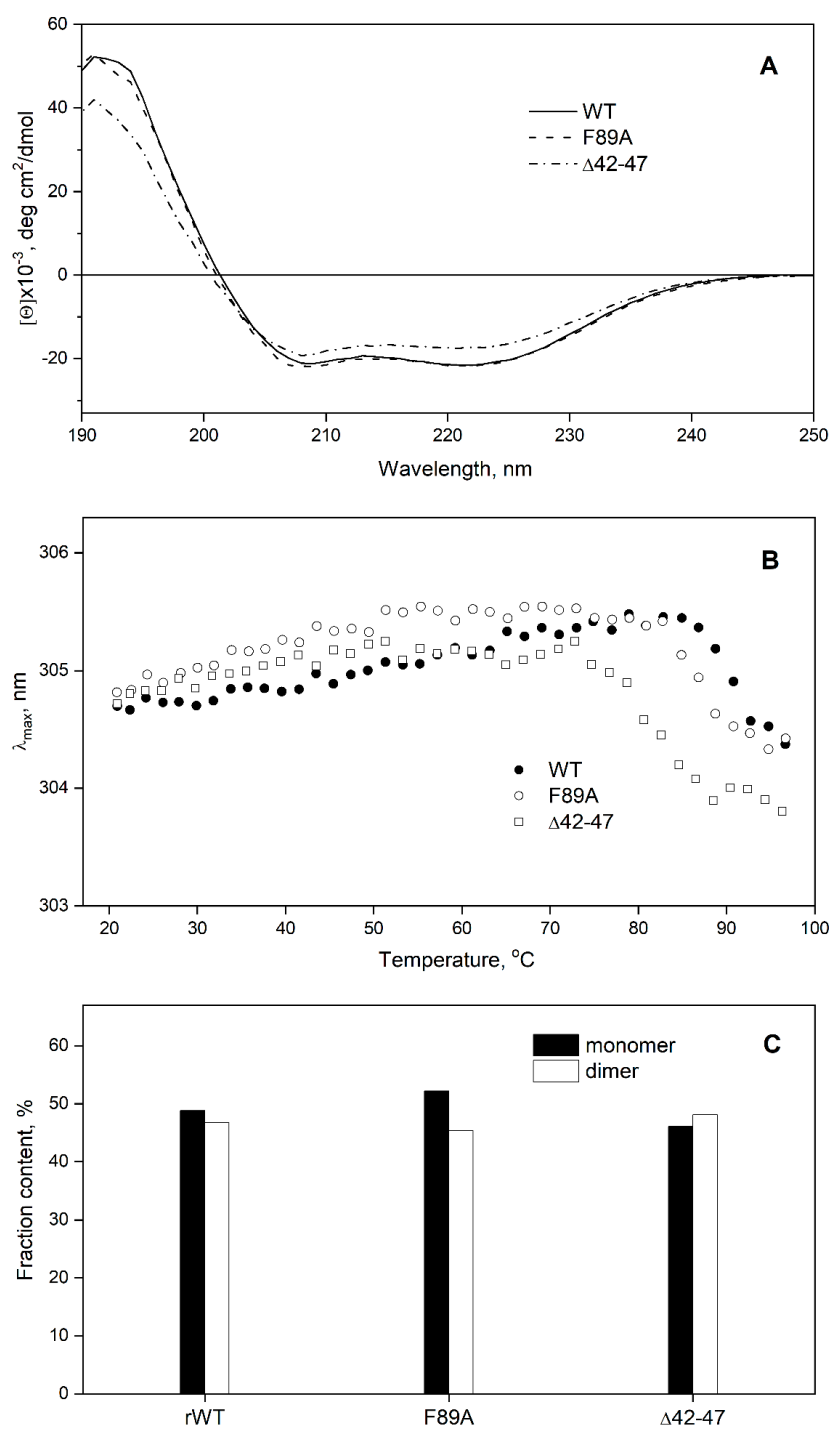

**Figure S1.** Comparison of structural properties of apo-forms of WT S100P and its F89A,  $\Delta 42-47$  mutants, using far-UV CD spectroscopy at 20°C (panel A), intrinsic fluorescence (B) and chemical crosslinking at 20 °C by 0.02% glutaraldehyde for 16 h (C) (10 mM



tricine-KOH, 1 mM EDTA-KOH, pH 7.4). Protein concentration was 10  $\mu$ M (**A**, **B**) or 67  $\mu$ M (**C**). Calcium depletion was performed according to ref. [113].

## References

1. Kazakov, A.S.; Sokolov, A.S.; Permyakova, M.E.; Litus, E.A.; Uversky, V.N.; Permyakov, E.A.; Permyakov, S.E. Specific cytokines of interleukin-6 family interact with S100 proteins. *Cell Calcium* **2022**, *101*, 102520, doi:10.1016/j.ceca.2021.102520.
2. Andreeva, A.; Kulesha, E.; Gough, J.; Murzin, A.G. The SCOP database in 2020: expanded classification of representative family and superfamily domains of known protein structures. *Nucleic Acids Res* **2020**, *48*, D376-D382, doi:10.1093/nar/gkz1064.
3. Papagoras, C.; Tsiami, S.; Chrysanthopoulou, A.; Mitroulis, I.; Baraliakos, X. Serum granulocyte-macrophage colony-stimulating factor (GM-CSF) is increased in patients with active radiographic axial spondyloarthritis and persists despite anti-TNF treatment. *Arthritis Research & Therapy* **2022**, *24*, 195, doi:10.1186/s13075-022-02888-6.
4. Riccio, A.; De Caterina, M.; Natale, D.; Grimaldi, E.; Pronesti, G.; Montagnani, S.; Postiglione, L. Serum Levels of Granulocyte Macrophage Colony Stimulating Factor (GM-CSF) in a Group of Patients with Systemic Sclerosis. *International Journal of Immunopathology and Pharmacology* **1996**, *9*, 9-12, doi:10.1177/039463209600900102.
5. Balleari, E.; Bason, C.; Visani, G.; Gobbi, M.; Ottaviani, E.; Ghio, R. Serum levels of granulocyte-macrophage colony-stimulating factor and granulocyte colony-stimulating factor in treated patients with chronic myelogenous leukemia in chronic phase. *Haematologica* **1994**, *79*, 7-12.
6. Fiehn, C.; Wermann, M.; Pezzutto, A.; Hufner, M.; Heilig, B. [Plasma GM-CSF concentrations in rheumatoid arthritis, systemic lupus erythematosus and spondyloarthropathy]. *Z Rheumatol* **1992**, *51*, 121-126.
7. Carrieri, P.B.; Provitera, V.; De Rosa, T.; Tartaglia, G.; Gorga, F.; Perrella, O. Profile of cerebrospinal fluid and serum cytokines in patients with relapsing-remitting multiple sclerosis: a correlation with clinical activity. *Immunopharmacol Immunotoxicol* **1998**, *20*, 373-382, doi:10.3109/08923979809034820.
8. Kleiner, G.; Marcuzzi, A.; Zanin, V.; Monasta, L.; Zauli, G. Cytokine levels in the serum of healthy subjects. *Mediators Inflamm* **2013**, *2013*, 434010, doi:10.1155/2013/434010.
9. Kutukculer, N.; Vergin, C.; Cetingul, N.; Kavakli, K.; Caglayan, S.; Oztop, S.; Nisli, G. Plasma interleukin-3 (IL-3) and IL-7 concentrations in children with homozygous beta-thalassemia. *J Trop Pediatr* **1997**, *43*, 366-367, doi:10.1093/tropej/43.6.366.
10. Biancotto, A.; Wank, A.; Perl, S.; Cook, W.; Olnes, M.J.; Dagur, P.K.; Fuchs, J.C.; Langweiler, M.; Wang, E.; McCoy, J.P. Baseline levels and temporal stability of 27 multiplexed serum cytokine concentrations in healthy subjects. *Plos One* **2013**, *8*, e76091, doi:10.1371/journal.pone.0076091.

11. Xiu, M.H.; Lin, C.G.; Tian, L.; Tan, Y.L.; Chen, J.; Chen, S.; Tan, S.P.; Wang, Z.R.; Yang, F.D.; Chen, D.C., et al. Increased IL-3 serum levels in chronic patients with schizophrenia: Associated with psychopathology. *Psychiatry Res* **2015**, *229*, 225-229, doi:10.1016/j.psychres.2015.07.029.
12. Lee, H.L.; Jang, J.W.; Lee, S.W.; Yoo, S.H.; Kwon, J.H.; Nam, S.W.; Bae, S.H.; Choi, J.Y.; Han, N.I.; Yoon, S.K. Inflammatory cytokines and change of Th1/Th2 balance as prognostic indicators for hepatocellular carcinoma in patients treated with transarterial chemoembolization. *Scientific Reports* **2019**, *9*, 3260, doi:10.1038/s41598-019-40078-8.
13. Lee, Y.C.; Lee, K.H.; Lee, H.B.; Rhee, Y.K. Serum levels of interleukins (IL)-4, IL-5, IL-13, and interferon-gamma in acute asthma. *J Asthma* **2001**, *38*, 665-671, doi:10.1081/jas-100107544.
14. Joseph, J.; Benedict, S.; Safa, W.; Joseph, M. Serum interleukin-5 levels are elevated in mild and moderate persistent asthma irrespective of regular inhaled glucocorticoid therapy. *BMC Pulm Med* **2004**, *4*, 2, doi:10.1186/1471-2466-4-2.
15. Dimitrova, D.; Youroukova, V.; Ivanova-Todorova, E.; Tumangelova-Yuzeir, K.; Velikova, T. Serum levels of IL-5, IL-6, IL-8, IL-13 and IL-17A in pre-defined groups of adult patients with moderate and severe bronchial asthma. *Respir Med* **2019**, *154*, 144-154, doi:10.1016/j.rmed.2019.06.024.
16. Perret, J.; McDonald, C.; Apostolopoulos, V. Elevated serum interleukin-5 levels in severe chronic obstructive pulmonary disease. *Acta Biochim Biophys Sin (Shanghai)* **2017**, *49*, 560-563, doi:10.1093/abbs/gmx030.
17. Fischer, M.; Bijman, M.; Molin, D.; Cormont, F.; Uyttenhove, C.; van Snick, J.; Sundstrom, C.; Enblad, G.; Nilsson, G. Increased serum levels of interleukin-9 correlate to negative prognostic factors in Hodgkin's lymphoma. *Leukemia* **2003**, *17*, 2513-2516, doi:10.1038/sj.leu.2403123.
18. Dantas, A.T.; Marques, C.D.L.; da Rocha Junior, L.F.; Cavalcanti, M.B.; Gonçalves, S.M.C.; Cardoso, P.R.G.; Mariz, H.d.A.; Rego, M.J.B.d.M.; Duarte, A.L.B.P.; Pitta, I.d.R., et al. Increased Serum Interleukin-9 Levels in Rheumatoid Arthritis and Systemic Lupus Erythematosus: Pathogenic Role or Just an Epiphenomenon? *Disease Markers* **2015**, *2015*, 519638, doi:10.1155/2015/519638.
19. Huang, Y.; Cao, Y.; Zhang, S.; Gao, F. Association between low expression levels of interleukin-9 and colon cancer progression. *Exp Ther Med* **2015**, *10*, 942-946, doi:10.3892/etm.2015.2588.
20. Defendenti, C.; Sarzi-Puttini, P.; Saibeni, S.; Bollani, S.; Bruno, S.; Almasio, P.L.; Declich, P.; Atzeni, F. Significance of serum IL-9 levels in inflammatory bowel disease. *Int J Immunopathol Pharmacol* **2015**, *28*, 569-575, doi:10.1177/0394632015600535.
21. Lv, X.; Feng, L.; Ge, X.; Lu, K.; Wang, X. Interleukin-9 promotes cell survival and drug resistance in diffuse large B-cell lymphoma. *J Exp Clin Cancer Res* **2016**, *35*, 106, doi:10.1186/s13046-016-0374-3.

22. Ciprandi, G.; De Amici, M.; Castellazzi, A.M.; Tosca, M.A.; Marseglia, G. Serum IL-9 levels depend on allergen exposure: preliminary study. *Int Arch Allergy Immunol* **2011**, *154*, 246-248, doi:10.1159/000321111.
23. Yanaba, K.; Yoshizaki, A.; Asano, Y.; Kadono, T.; Sato, S. Serum interleukin 9 levels are increased in patients with systemic sclerosis: association with lower frequency and severity of pulmonary fibrosis. *J Rheumatol* **2011**, *38*, 2193-2197, doi:10.3899/jrheum.110268.
24. Martínez-Reyes, C.P.; Gómez-Arauz, A.Y.; Torres-Castro, I.; Manjarrez-Reyna, A.N.; Palomera, L.F.; Olivós-García, A.; Mendoza-Tenorio, E.; Sánchez-Medina, G.A.; Islas-Andrade, S.; Melendez-Mier, G., et al. Serum Levels of Interleukin-13 Increase in Subjects with Insulin Resistance but Do Not Correlate with Markers of Low-Grade Systemic Inflammation. *Journal of Diabetes Research* **2018**, *2018*, 7209872, doi:10.1155/2018/7209872.
25. Nabavi, M.; Arshi, S.; Bahrami, A.; Aryan, Z.; Bemanian, M.H.; Esmaeilzadeh, H.; Jalali, F.; Pousti, S.B.; Rezaei, N. Increased level of interleukin-13, but not interleukin-4 and interferon- $\gamma$  in chronic rhinosinusitis with nasal polyps. *Allergologia et Immunopathologia* **2014**, *42*, 465-471, doi:10.1016/j.aller.2013.06.007.
26. Cingu, A.K.; Turkcu, F.M.; Aktas, S.; Sahin, A.; Ayyildiz, O. Serum IL-4, IL-12, IL-13, IL-27, and IL-33 levels in active and inactive ocular Behcet's disease. *International Ophthalmology* **2020**, *40*, 3441-3451, doi:10.1007/s10792-020-01530-1.
27. Spadaro, A.; Rinaldi, T.; Riccieri, V.; Valesini, G.; Taccari, E. Interleukin 13 in synovial fluid and serum of patients with psoriatic arthritis. *Ann Rheum Dis* **2002**, *61*, 174-176, doi:10.1136/ard.61.2.174.
28. Versace, A.G.; Bitto, A.; Ioppolo, C.; Aragona, C.O.; La Rosa, D.; Roberts, W.N.; D'Angelo, T.; Cinquegrani, A.; Cirmi, S.; Irrera, N., et al. IL-13 and IL-33 Serum Levels Are Increased in Systemic Sclerosis Patients With Interstitial Lung Disease. *Front Med (Lausanne)* **2022**, *9*, 825567, doi:10.3389/fmed.2022.825567.
29. Mielnik, P.; Chwalinska-Sadowska, H.; Wiesik-Szewczyk, E.; Maslinski, W.; Olesinska, M. Serum concentration of interleukin 15, interleukin 2 receptor and TNF receptor in patients with polymyositis and dermatomyositis: correlation to disease activity. *Rheumatol Int* **2012**, *32*, 639-643, doi:10.1007/s00296-010-1692-y.
30. Kaibe, M.; Ohishi, M.; Ito, N.; Yuan, M.; Takagi, T.; Terai, M.; Tatara, Y.; Komai, N.; Rakugi, H.; Ogihara, T. Serum Interleukin-15 Concentration in Patients With Essential Hypertension\*. *American Journal of Hypertension* **2005**, *18*, 1019-1025, doi:10.1016/j.amjhyper.2005.02.014.
31. Jang, G.-C.; Kim, H.-Y.; Ahn, S.-Y.; Kim, D.-S. Raised serum interleukin 15 levels in Kawasaki disease. *Annals of the Rheumatic Diseases* **2003**, *62*, 264-266, doi:10.1136/ard.62.3.264.
32. Mengus, C.; Le Magnen, C.; Trella, E.; Yousef, K.; Bubendorf, L.; Provenzano, M.; Bachmann, A.; Heberer, M.; Spagnoli, G.C.; Wyler, S. Elevated levels of circulating IL-7 and

IL-15 in patients with early stage prostate cancer. *Journal of Translational Medicine* **2011**, *9*, 162, doi:10.1186/1479-5876-9-162.

33. Rentzos, M.; Cambouri, C.; Rombos, A.; Nikolaou, C.; Anagnostouli, M.; Tsoutsou, A.; Dimitrakopoulos, A.; Triantafyllou, N.; Vassilopoulos, D. IL-15 is elevated in serum and cerebrospinal fluid of patients with multiple sclerosis. *J Neurol Sci* **2006**, *241*, 25-29, doi:10.1016/j.jns.2005.10.003.
34. Fehniger, T.A.; Caligiuri, M.A. Interleukin 15: biology and relevance to human disease. *Blood* **2001**, *97*, 14-32, doi:10.1182/blood.v97.1.14.
35. Lauw, F.N.; Simpson, A.J.H.; Prins, J.M.; Smith, M.D.; Kurimoto, M.; van Deventer, S.J.H.; Speelman, P.; Chaowagul, W.; White, N.J.; van der Poll, T. Elevated Plasma Concentrations of Interferon (IFN)- $\gamma$  and the IFN- $\gamma$ —Inducing Cytokines Interleukin (IL)-18, IL-12, and IL-15 in Severe Melioidosis. *The Journal of Infectious Diseases* **1999**, *180*, 1878-1885, doi:10.1086/315155.
36. He, Z.; Jin, L.; Liu, Z.F.; Hu, L.; Dang, E.L.; Feng, Z.Z.; Li, Q.J.; Wang, G. Elevated serum levels of interleukin 21 are associated with disease severity in patients with psoriasis. *Br J Dermatol* **2012**, *167*, 191-193, doi:10.1111/j.1365-2133.2012.10899.x.
37. Pan, H.-F.; Wu, G.-C.; Fan, Y.-G.; Leng, R.-X.; Peng, H.; Zhou, M.; Li, B.-Z.; Zhu, Y.; Tao, J.-H.; Li, X.-P., et al. Decreased serum level of IL-21 in new-onset systemic lupus erythematosus patients. *Rheumatology International* **2013**, *33*, 2337-2342, doi:10.1007/s00296-013-2724-1.
38. Mizutani, H.; Tamagawa-Mineoka, R.; Nakamura, N.; Masuda, K.; Katoh, N. Serum IL-21 levels are elevated in atopic dermatitis patients with acute skin lesions. *Allergol Int* **2017**, *66*, 440-444, doi:10.1016/j.alit.2016.10.010.
39. Chen, H.M.; Liu, H.L.; Yang, Y.C.; Cheng, X.L.; Wang, Y.F.; Xing, F.F.; Zhao, Y.R. Serum IL-21 levels associated with chronic hepatitis B and hepatitis B-related liver failure. *Exp Ther Med* **2014**, *7*, 1013-1019, doi:10.3892/etm.2014.1533.
40. Ding, R.; Gao, W.; He, Z.; Liao, M.; Wu, F.; Zou, S.; Ma, L.; Liang, C.; Wu, Z. Effect of serum interleukin 21 on the development of coronary artery disease. *APMIS* **2014**, *122*, 842-847, doi:10.1111/apm.12246.
41. Temel, T.; Cansu, D.U.; Temel, H.E.; Ozakyol, A.H. Serum thrombopoietin levels and its relationship with thrombocytopenia in patients with cirrhosis. *Hepat Mon* **2014**, *14*, e18556, doi:10.5812/hepatmon.18556.
42. Usuki, K.; Tahara, T.; Iki, S.; Endo, M.; Osawa, M.; Kitazume, K.; Kato, T.; Miyazaki, H.; Urabe, A. Serum thrombopoietin level in various hematological diseases. *Stem Cells* **1996**, *14*, 558-565, doi:10.1002/stem.140558.
43. Ballmaier, M.; Schulze, H.; Strauß, G.; Cherkaoui, K.; Wittner, N.; Lynen, S.; Wolters, S.; Bogenberger, J.; Welte, K. Thrombopoietin in Patients With Congenital Thrombocytopenia and Absent Radii: Elevated Serum Levels, Normal Receptor Expression, But Defective Reactivity to Thrombopoietin. *Blood* **1997**, *90*, 612-619, doi:10.1182/blood.V90.2.612.

44. Tsukishiro, S.; Suzumori, N.; Nishikawa, H.; Arakawa, A.; Suzumori, K. Preoperative serum thrombopoietin levels are higher in patients with ovarian cancer than with benign cysts. *European Journal of Obstetrics and Gynecology and Reproductive Biology* **2008**, *140*, 67-70, doi:10.1016/j.ejogrb.2005.10.037.
45. Makar, R.S.; Zhukov, O.S.; Sahud, M.A.; Kuter, D.J. Thrombopoietin levels in patients with disorders of platelet production: diagnostic potential and utility in predicting response to TPO receptor agonists. *Am J Hematol* **2013**, *88*, 1041-1044, doi:10.1002/ajh.23562.
46. Ezzat, M.H.; Hasan, Z.E.; Shaheen, K.Y. Serum measurement of interleukin-31 (IL-31) in paediatric atopic dermatitis: elevated levels correlate with severity scoring. *J Eur Acad Dermatol Venereol* **2011**, *25*, 334-339, doi:10.1111/j.1468-3083.2010.03794.x.
47. Ginaldi, L.; De Martinis, M.; Ciccarelli, F.; Saitta, S.; Imbesi, S.; Mannucci, C.; Gangemi, S. Increased levels of interleukin 31 (IL-31) in osteoporosis. *BMC Immunology* **2015**, *16*, 60, doi:10.1186/s12865-015-0125-9.
48. Rosine, N.; Etcheto, A.; Hendel-Chavez, H.; Seror, R.; Briot, K.; Molto, A.; Chanson, P.; Taoufik, Y.; Wendling, D.; Lories, R., et al. Increase In IL-31 Serum Levels Is Associated With Reduced Structural Damage In Early Axial Spondyloarthritis. *Scientific Reports* **2018**, *8*, 7731, doi:10.1038/s41598-018-25722-z.
49. Swierczynska, K.; Krajewski, P.K.; Nowicka-Suszko, D.; Bialynicki-Birula, R.; Krajewska, M.; Szepietowski, J.C. The Serum Level of IL-31 in Patients with Chronic Kidney Disease-Associated Pruritus: What Can We Expect? *Toxins (Basel)* **2022**, *14*, doi:10.3390/toxins14030197.
50. Raap, U.; Wichmann, K.; Bruder, M.; Stander, S.; Wedi, B.; Kapp, A.; Werfel, T. Correlation of IL-31 serum levels with severity of atopic dermatitis. *J Allergy Clin Immunol* **2008**, *122*, 421-423, doi:10.1016/j.jaci.2008.05.047.
51. Zeng, X.; Zhang, Z.; Gao, Q.Q.; Wang, Y.Y.; Yu, X.Z.; Zhou, B.; Xi, M.R. Clinical Significance of Serum Interleukin-31 and Interleukin-33 Levels in Patients of Endometrial Cancer: A Case Control Study. *Dis Markers* **2016**, *2016*, 9262919, doi:10.1155/2016/9262919.
52. Hassan, W.A.; Hamaad, G.A.; Sayed, E.A.; El Behisy, M.M.; Gomaa, M.K. Clinical significance of interleukin 27 serum concentration in patients with systemic sclerosis: relation to clinical, laboratory and radiological parameters. *Egyptian Rheumatology and Rehabilitation* **2019**, *46*, 101-107, doi:10.4103/err.err\_63\_18.
53. Swaminathan, S.; Hu, Z.; Rupert, A.W.; Higgins, J.M.; Dewar, R.L.; Stevens, R.; Chen, Q.; Rehm, C.A.; Metcalf, J.A.; Baseler, M.W., et al. Plasma Interleukin-27 (IL-27) Levels Are Not Modulated in Patients with Chronic HIV-1 Infection. *Plos One* **2014**, *9*, e98989, doi:10.1371/journal.pone.0098989.
54. Hassan, T.; Abdel Rahman, D.; Raafat, N.; Fathy, M.; Shehab, M.; Hosny, A.; Fawzy, R.; Zakaria, M. Contribution of interleukin 27 serum level to pathogenesis and prognosis in children with immune thrombocytopenia. *Medicine (Baltimore)* **2022**, *101*, e29504, doi:10.1097/MD.00000000000029504.

55. Jafarzadeh, A.; Nemati, M.; Rezayati, M.T. Serum levels of interleukin (IL)-27 in patients with ischemic heart disease. *Cytokine* **2011**, *56*, 153-156, doi:10.1016/j.cyto.2011.06.014.
56. Yan, A.; You, H.; Zhang, X. Levels of Interleukin 27 and Interleukin 35 in the Serum and Vitreous of Patients with Proliferative Diabetic Retinopathy. *Ocul Immunol Inflamm* **2018**, *26*, 273-279, doi:10.1080/09273948.2016.1203959.
57. Lukawska-Tatarczuk, M.; Franek, E.; Czupryniak, L.; Joniec-Maciejak, I.; Pawlak, A.; Wojnar, E.; Zielinski, J.; Mirowska-Guzel, D.; Mrozikiewicz-Rakowska, B. Sirtuin 1, Visfatin and IL-27 Serum Levels of Type 1 Diabetic Females in Relation to Cardiovascular Parameters and Autoimmune Thyroid Disease. *Biomolecules* **2021**, *11*, doi:1110 [pii] 10.3390/biom11081110.
58. Forrester, M.A.; Robertson, L.; Bayoumi, N.; Keavney, B.D.; Barker, R.N.; Vickers, M.A. Human interleukin-27: wide individual variation in plasma levels and complex inter-relationships with interleukin-17A. *Clin Exp Immunol* **2014**, *178*, 373-383, doi:10.1111/cei.12408.
59. Batebi, A.; Namavar-Jahromi, B.; Ali-Hassanzadeh, M.; Ahmadi, M.; Hosseini, M.S.; Gharesi-Fard, B. Evaluation of IL-17 and IL-35 Serum Levels in Patients with Preeclampsia. *J Reprod Infertil* **2019**, *20*, 237-243.
60. Gu, J.H.; Wang, X.G.; Wang, L.Q.; Zhou, L.N.; Tang, M.; Li, P.; Wu, X.Y.; Chen, M.B.; Zhang, Y. Serum level of interleukin-35 as a potential prognostic factor for gastric cancer. *Asia Pac J Clin Oncol* **2021**, *17*, 52-59, doi:10.1111/ajco.13403.
61. Chatrabnous, N.; Ghaderi, A.; Ariaifar, A.; Razeghinia, M.S.; Nemati, M.; Jafarzadeh, A. Serum concentration of interleukin-35 and its association with tumor stages and FOXP3 gene polymorphism in patients with prostate cancer. *Cytokine* **2019**, *113*, 221-227, doi:10.1016/j.cyto.2018.07.006.
62. Li, Y.; Yao, L.; Liu, S.; JishengWu; Xia, L.; Shen, H.; Lu, J. Correlation between Serum IL-35 Levels and Bone Loss in Postmenopausal Women with Rheumatoid Arthritis. *Mediators Inflamm* **2019**, *2019*, 9139145, doi:10.1155/2019/9139145.
63. Eslami, M.; Rafiei, A.; Baghbanian, S.M.; Fattahi, S.; Yazdani, Z.; Valadan, R.; Kardan, M. Serum levels and genetic variation of IL-35 are associated with multiple sclerosis: a population-based case-control study. *Immunol Res* **2022**, *70*, 75-85, doi:10.1007/s12026-021-09246-9.
64. Tomcik, M.; Zerr, P.; Palumbo-Zerr, K.; Storkanova, H.; Hulejova, H.; Spiritovic, M.; Kodet, O.; Stork, J.; Becvar, R.; Vencovsky, J., et al. Interleukin-35 is upregulated in systemic sclerosis and its serum levels are associated with early disease. *Rheumatology (Oxford)* **2015**, *54*, 2273-2282, doi:10.1093/rheumatology/kev260.
65. Dantas, A.T.; Goncalves, S.M.; Pereira, M.C.; Goncalves, R.S.; Marques, C.D.; Rego, M.J.; Pitta Ida, R.; Duarte, A.L.; Pitta, M.G. Increased IL-35 serum levels in systemic sclerosis and association with pulmonary interstitial involvement. *Clin Rheumatol* **2015**, *34*, 1621-1625, doi:10.1007/s10067-015-3006-y.

66. Kawakami, M.; Tsutsumi, H.; Kumakawa, T.; Abe, H.; Hirai, M.; Kurosawa, S.; Mori, M.; Fukushima, M. Levels of serum granulocyte colony-stimulating factor in patients with infections. *Blood* **1990**, *76*, 1962-1964, doi:S0006-4971(20)82103-X [pii].
67. Bordbar, E.; Malekzadeh, M.; Ardekani, M.T.; Doroudchi, M.; Ghaderi, A. Serum levels of G-CSF and IL-7 in Iranian breast cancer patients. *Asian Pac J Cancer Prev* **2012**, *13*, 5307-5312, doi:10.7314/apjcp.2012.13.10.5307.
68. Pauksen, K.; Elfman, L.; Ulfgren, A.K.; Venge, P. Serum levels of granulocyte-colony stimulating factor (G-CSF) in bacterial and viral infections, and in atypical pneumonia. *Br J Haematol* **1994**, *88*, 256-260, doi:10.1111/j.1365-2141.1994.tb05015.x.
69. Morozumi, K.; Namiki, S.; Kudo, T.; Aizawa, M.; Ioritani, N. Serum G-CSF May Be a More Valuable Biomarker than Image Evaluation in G-CSF-Producing Urothelial Carcinoma: A Case Report. *Case Rep Oncol* **2017**, *10*, 377-382, doi:10.1159/000472250.
70. Watari, K.; Asano, S.; Shirafuji, N.; Kodo, H.; Ozawa, K.; Takaku, F.; Kamachi, S. Serum granulocyte colony-stimulating factor levels in healthy volunteers and patients with various disorders as estimated by enzyme immunoassay. *Blood* **1989**, *73*, 117-122.
71. Gross-Weege, W.; Dumon, K.; Dahmen, A.; Schneider, E.M.; Röher, H.D. Granulocyte colony-stimulating factor (G-CSF) serum levels in surgical intensive care patients. *Infection* **1997**, *25*, 213-216, doi:10.1007/bf01713146.
72. Triantafillidis, J.K.; Merikas, E.; Govosdis, V.; Konstandellou, E.; Cheracakis, P.; Barbatzas, C.; Tzourmakliotis, D.; Peros, G. Increased fasting serum levels of growth hormone and gastrin in patients with gastric and large bowel cancer. *Hepatogastroenterology* **2003**, *50 Suppl 2*, cclvi-cclx.
73. Elkarow, M.H.; Hamdy, A. A Suggested Role of Human Growth Hormone in Control of the COVID-19 Pandemic. *Front Endocrinol (Lausanne)* **2020**, *11*, 569633, doi:10.3389/fendo.2020.569633.
74. Akirov, A.; Masri-Iraqi, H.; Dotan, I.; Shimon, I. The Biochemical Diagnosis of Acromegaly. *J Clin Med* **2021**, *10*, doi:10.3390/jcm10051147.
75. Ishikawa, M.; Yokoya, S.; Tachibana, K.; Hasegawa, Y.; Yasuda, T.; Tokuhiro, E.; Hashimoto, Y.; Tanaka, T. Serum levels of 20-kilodalton human growth hormone (GH) are parallel those of 22-kilodalton human GH in normal and short children. *J Clin Endocrinol Metab* **1999**, *84*, 98-104, doi:10.1210/jcem.84.1.5402.
76. Christiansen, M. Placental growth hormone and growth hormone binding protein are first trimester maternal serum markers of Down syndrome. *Prenat Diagn* **2009**, *29*, 1249-1255, doi:10.1002/pd.2398.
77. Mittal, P.; Espinoza, J.; Hassan, S.; Kusanovic, J.P.; Edwin, S.S.; Nien, J.K.; Gotsch, F.; Than, N.G.; Erez, O.; Mazaki-Tovi, S., et al. Placental growth hormone is increased in the maternal and fetal serum of patients with preeclampsia. *J Matern Fetal Neonatal Med* **2007**, *20*, 651-659, doi:10.1080/14767050701463571.

78. Juhasz, E.; Kiss, E.; Simonova, E.; Patocs, A.; Reismann, P. Serum prolactin as a biomarker for the study of intracerebral dopamine effect in adult patients with phenylketonuria: a cross-sectional monocentric study. *Eur J Med Res* **2016**, *21*, 22, doi:10.1186/s40001-016-0212-2.
79. Jacobi, A.M.; Rohde, W.; Ventz, M.; Riemekasten, G.; Burmester, G.R.; Hiepe, F. Enhanced serum prolactin (PRL) in patients with systemic lupus erythematosus: PRL levels are related to the disease activity. *Lupus* **2001**, *10*, 554-561, doi:10.1191/096120301701549688.
80. Keen, M.A.; Hassan, I. Serum prolactin levels in psoriasis and its association with disease activity: a case-control study. *Indian J Dermatol* **2014**, *59*, 562-566, doi:10.4103/0019-5154.143512.
81. Cohen, A.D.; Cohen, Y.; Maislos, M.; Buskila, D. Prolactin serum level in patients with breast cancer. *Isr Med Assoc J* **2000**, *2*, 287-289.
82. Al-Nami, M.S.; Al-Kuraishy, H.M.; Al-Gareeb, A.I.; Al-Mamoori, F. Metabolic profile and prolactin serum levels in men with type 2 diabetes mellitus: Old-new rubric. *Int J Crit Illn Inj Sci* **2019**, *9*, 120-126, doi:10.4103/IJCIHS.IJCIHS\_40\_19.
83. Szczepankiewicz, D.; Sobkowiak, P.; Narozna, B.; Wojsyk-Banaszak, I.; Breborowicz, A.; Szczepankiewicz, A. Leptin gene polymorphism affects leptin level in childhood asthma. *World J Pediatr* **2018**, *14*, 601-606, doi:10.1007/s12519-018-0182-2.
84. Kvistad, S.S.; Myhr, K.M.; Holmoy, T.; Benth, J.S.; Wergeland, S.; Beiske, A.G.; Bjerve, K.S.; Hovdal, H.; Midgard, R.; Sagen, J.V., et al. Serum levels of leptin and adiponectin are not associated with disease activity or treatment response in multiple sclerosis. *J Neuroimmunol* **2018**, *323*, 73-77, doi:10.1016/j.jneuroim.2018.07.011.
85. Fahmi, R.M.; Kamel, A.E.; Elsayed, D.A.; Zidan, A.A.; Sarhan, N.T. Serum levels of leptin and adiponectin in patients with multiple sclerosis. *The Egyptian Journal of Neurology, Psychiatry and Neurosurgery* **2021**, *57*, 114, doi:10.1186/s41983-021-00369-2.
86. Demiray, G.; Degirmencioglu, S.; Ugurlu, E.; Yaren, A. Effects of Serum Leptin and Resistin Levels on Cancer Cachexia in Patients With Advanced-Stage Non-Small Cell Lung Cancer. *Clin Med Insights Oncol* **2017**, *11*, 1179554917690144, doi:10.1177/1179554917690144.
87. Duan, D.M.; Jhang, J.Y.; Wu, S.; Teng, M.S.; Hsu, L.A.; Ko, Y.L. Modification effect of sex and obesity on the correlation of LEP polymorphisms with leptin levels in Taiwanese obese women. *Mol Genet Genomic Med* **2020**, *8*, e1113, doi:10.1002/mgg3.1113.
88. Ko, B.J.; Lee, M.; Park, H.S.; Han, K.; Cho, G.J.; Hwang, T.G.; Kim, J.H.; Lee, S.H.; Lee, H.Y.; Kim, S.M. Elevated vaspin and leptin levels are associated with obesity in prepubertal Korean children. *Endocr J* **2013**, *60*, 609-616, doi:10.1507/endocrj.ej12-0384.
89. Teresa Gonzalez-Garza, M.; Elva Cruz-Vega, D.; Maldonado-Bernal, C. IL10 as Cancer Biomarker. **2021**, 10.5772/intechopen.90806, doi:10.5772/intechopen.90806.
90. Sobhan, M.R.; Farshchian, M.; Hoseinzadeh, A.; Ghasemibasir, H.R.; Solgi, G. Serum Levels of IL-10 and IL-22 Cytokines in Patients with Psoriasis. *Iran J Immunol* **2016**, *13*, 317-323.



91. Hussien, D.T.; Shabana, A.A.; Hassan, A.S.; Elmarghany, E.B. Assessment of serum interleukin-20 level in rheumatoid arthritis patients: Relation to disease activity and ultrasound measures. *The Egyptian Rheumatologist* **2022**, *44*, 181-186, doi:10.1016/j.ejr.2022.01.002.
92. Michalak-Stoma, A.; Bartosinska, J.; Kowal, M.; Juskiewicz-Borowiec, M.; Gerkowicz, A.; Chodorowska, G. Serum levels of selected Th17 and Th22 cytokines in psoriatic patients. *Dis Markers* **2013**, *35*, 625-631, doi:10.1155/2013/856056.
93. Naumnik, W.; Naumnik, B.; Niklińska, W.; Ossolińska, M.; Chyczewska, E. Clinical Implications of Hepatocyte Growth Factor, Interleukin-20, and Interleukin-22 in Serum and Bronchoalveolar Fluid of Patients with Non-Small Cell Lung Cancer. In *Advancements in Clinical Research*, Pokorski, M., Ed. Springer International Publishing: Cham, 2016; 10.1007/5584\_2016\_66pp. 41-49.
94. Kragstrup, T.W.; Otkjaer, K.; Holm, C.; Jorgensen, A.; Hokland, M.; Iversen, L.; Deleuran, B. The expression of IL-20 and IL-24 and their shared receptors are increased in rheumatoid arthritis and spondyloarthropathy. *Cytokine* **2008**, *41*, 16-23, doi:10.1016/j.cyto.2007.10.004.
95. Valentina, M.; Jan, F.; Peder, N.L.; Bo, Z.; Hongjie, D.; Pernille, K. Cytokine detection and simultaneous assessment of rheumatoid factor interference in human serum and synovial fluid using high-sensitivity protein arrays on plasmonic gold chips. *BMC Biotechnol* **2015**, *15*, 73, doi:10.1186/s12896-015-0186-0.
96. Aydogdu, E.; Pamuk, O.N.; Donmez, S.; Pamuk, G.E. Decreased interleukin-20 level in patients with systemic sclerosis: are they related with angiogenesis? *Clin Rheumatol* **2013**, *32*, 1599-1603, doi:10.1007/s10067-013-2317-0.
97. Wang, T.; Zhang, Z.; Xing, H.; Wang, L.; Zhang, G.; Yu, N.; Wang, J.; Guo, W.; Jiang, J. Elevated Th22 cells and related cytokines in patients with epithelial ovarian cancer. *Medicine (Baltimore)* **2017**, *96*, e8359, doi:10.1097/MD.00000000000008359.
98. Tsirakis, G.; Pappa, C.A.; Kolovou, A.; Kokonozaki, M.; Neonakis, I.; Alexandrakis, M.G. Clinical significance of interleukin-22 in multiple myeloma. *Hematology* **2015**, *20*, 143-147, doi:10.1179/1607845414Y.00000000182.
99. Souza, J.M.; Matias, B.F.; Rodrigues, C.M.; Murta, E.F.; Michelin, M.A. IL-17 and IL-22 serum cytokine levels in patients with squamous intraepithelial lesion and invasive cervical carcinoma. *Eur J Gynaecol Oncol* **2013**, *34*, 466-468.
100. Abdullah, H.N.; Abdulwahid, A.G. Expression of Serum IL-22, IL-23, and TLR9 as Tumor Markers in Untreated Breast Cancer Patients. *Journal of drug delivery* **2020**, *10*, 472-476.
101. Thomas-Dupont, P.; Remes-Troche, J.M.; Izaguirre-Hernández, I.Y.; Sánchez-Vargas, L.A.; Maldonado-Rentería, M.d.J.; Hernández-Flores, K.G.; Torre, A.; Bravo-Sarmiento, E.; Vivanco-Cid, H. Elevated circulating levels of IL-21 and IL-22 define a cytokine signature profile in type 2 autoimmune hepatitis patients. *Annals of Hepatology* **2016**, *15*, 550-558, doi:10.5604/16652681.1203152.

102. Khoshroo, M.; Yazdanpanah, M.J.; Yasrebi, S. Serum Interleukin-24 Levels in Gastric and Breast Cancers and Non-cancerous Inflammations. *Middle East Journal of Cancer* **2021**, *12*, 183-189, doi:10.30476/mejc.2020.82945.1122.
103. Li, R.C.; Guo, J.; Su, L.C.; Huang, A.F. Elevated levels of IL-24 in systemic lupus erythematosus patients. *Lupus* **2019**, *28*, 748-754, doi:10.1177/0961203319845476.
104. Brilland, B.; Bach-Bunner, M.; Gomes, C.N.; Larochette, V.; Foucher, E.; Plaisance, M.; Saulnier, P.; Costedoat-Chalumeau, N.; Ghillani, P.; Belizna, C., et al. Serum Interleukin-26 Is a New Biomarker for Disease Activity Assessment in Systemic Lupus Erythematosus. *Front Immunol* **2021**, *12*, 663192, doi:10.3389/fimmu.2021.663192.
105. Shen, Y.; Dong, X.; Liu, J.; Lv, H.; Ge, Y. Serum Interleukin-26 is a Potential Biomarker for the Differential Diagnosis of Neurosyphilis and Syphilis at Other Stages. *Infect Drug Resist* **2022**, *15*, 3693-3702, doi:10.2147/IDR.S366308.
106. Louhaichi, S.; Mlika, M.; Hamdi, B.; Hamzaoui, K.; Hamzaoui, A. Sputum IL-26 Is Overexpressed in Severe Asthma and Induces Proinflammatory Cytokine Production and Th17 Cell Generation: A Case-Control Study of Women. *J Asthma Allergy* **2020**, *13*, 95-107, doi:10.2147/JAA.S229522.
107. Kaabachi, W.; Bouali, E.; Berraïes, A.; Dhifallh, I.B.; Hamdi, B.; Hamzaoui, K.; Hamzaoui, A. Interleukin-26 is overexpressed in Behçet's disease and enhances Th17 related -cytokines. *Immunology Letters* **2017**, *190*, 177-184, doi:10.1016/j.imlet.2017.08.008.
108. Corvaisier, M.; Delneste, Y.; Jeanvoine, H.; Preisser, L.; Blanchard, S.; Garo, E.; Hoppe, E.; Barre, B.; Audran, M.; Bouvard, B., et al. IL-26 is overexpressed in rheumatoid arthritis and induces proinflammatory cytokine production and Th17 cell generation. *PLoS Biol* **2012**, *10*, e1001395, doi:10.1371/journal.pbio.1001395.
109. Liao, A.P.; Salajegheh, M.; Nazareno, R.; Kagan, J.C.; Jubin, R.G.; Greenberg, S.A. Interferon beta is associated with type 1 interferon-inducible gene expression in dermatomyositis. *Ann Rheum Dis* **2011**, *70*, 831-836, doi:10.1136/ard.2010.139949.
110. Berman, H.M.; Westbrook, J.; Feng, Z.; Gilliland, G.; Bhat, T.N.; Weissig, H.; Shindyalov, I.N.; Bourne, P.E. The Protein Data Bank. *Nucleic Acids Res.* **2000**, *28*, 235-242.
111. Jumper, J.; Evans, R.; Pritzel, A.; Green, T.; Figurnov, M.; Ronneberger, O.; Tunyasuvunakool, K.; Bates, R.; Zidek, A.; Potapenko, A., et al. Highly accurate protein structure prediction with AlphaFold. *Nature* **2021**, *596*, 583-589, doi:10.1038/s41586-021-03819-2.
112. Desta, I.T.; Porter, K.A.; Xia, B.; Kozakov, D.; Vajda, S. Performance and Its Limits in Rigid Body Protein-Protein Docking. *Structure* **2020**, *28*, 1071-1081 e1073, doi:10.1016/j.str.2020.06.006.
113. Blum, H.E.; Lehky, P.; Kohler, L.; Stein, E.A.; Fischer, E.H. Comparative properties of vertebrate parvalbumins. *J.Biol.Chem.* **1977**, *252*, 2834-2838.
